# Supplementary material for: Knockdown of Vacuolar ATPase Subunit G Gene Affects Larval Survival and Impaired Pupation and Adult Emergence in Henosepilachna vigintioctopunctata
Source: MDPI journal article supplement (doi:10.3390/insects12100935), 2021-10-14
Supplement: s1 [file s1]

**Table S1.** Primers used in RT-PCR, dsRNA synthesis and qPCR.

| Fragment name          | Forward primer         | Reverse primer        |
|------------------------|------------------------|-----------------------|
| <b>RT-PCR</b>          |                        |                       |
| <i>HvATPaseG</i>       | GCACATTATGATGTTCAAGCTC | AACTGGGGAGGATTGACTTT  |
| <b>dsRNA synthesis</b> |                        |                       |
| dsG                    | AACTGGCGTTCCCTTTCC     | GCAAGTCAAACACAAGGCATT |
| dsegfp                 | AAGTTCAGCGTGTCGG       | CACCTTGATGCCGTTT      |
| <b>qPCR</b>            |                        |                       |
| <i>qHvATPaseG</i>      | GGCAAGTCAAACACAAGGCA   | GGCGTTCCCTTTTCCTTACGA |
| <i>qHvRPS18</i>        | CGCAATCAAAGGTGTTGGAAG  | GCCTAGGGTTGGCCATAATAG |
| <i>qHvRPL13</i>        | AGCATCCTTCGCTCGTTTAG   | TTCGACAACCTGCCATTAGG  |

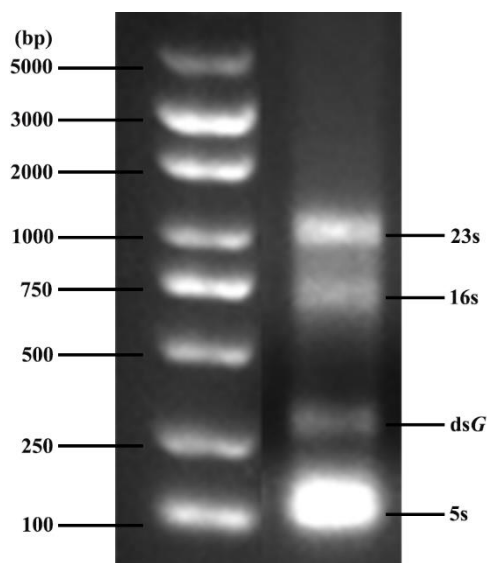

**Figure S1.** Electrophoresis of target dsRNA on 1% agarose gel.

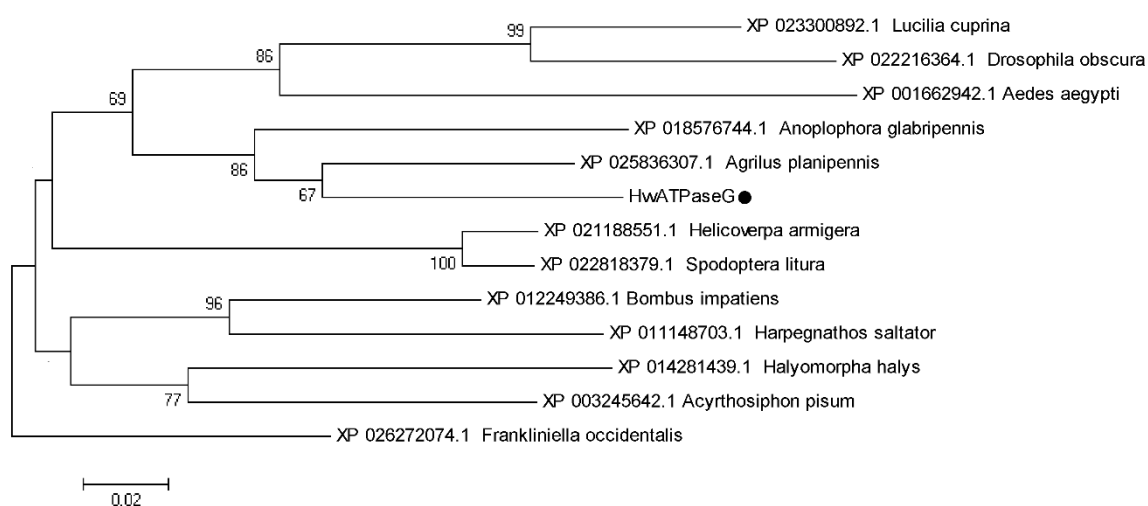

**Figure S2.** Phylogenetic analysis of vacuolar ATPase V1 subunit G proteins (vATPaseGs). The proteins are derived from three Dipteran *Lucilia cuprina*, *Drosophila melanogaster* and *Aedes aegypti*, three Coleopteran *Henosepilachna vigintioctopunctata*, *Anoplophora glabripennis* and *Agrilus planipennis*, two Lepidopteran *Helicoverpa armigera* and *Spodoptera litura*, two Hymenopteran *Bombus impatiens* and *Harpegnathos saltator*, two Hemipteran *Halyomorpha halys* and *Acyrthosiphon pisum*, and a Thysanopteran *Frankliniella occidentalis*. The tree is constructed using the neighbor-joining method based on the full-length protein sequence alignments. Bootstrap analyses of 1000 replications are carried out and bootstrap values > 50% are shown on the tree.

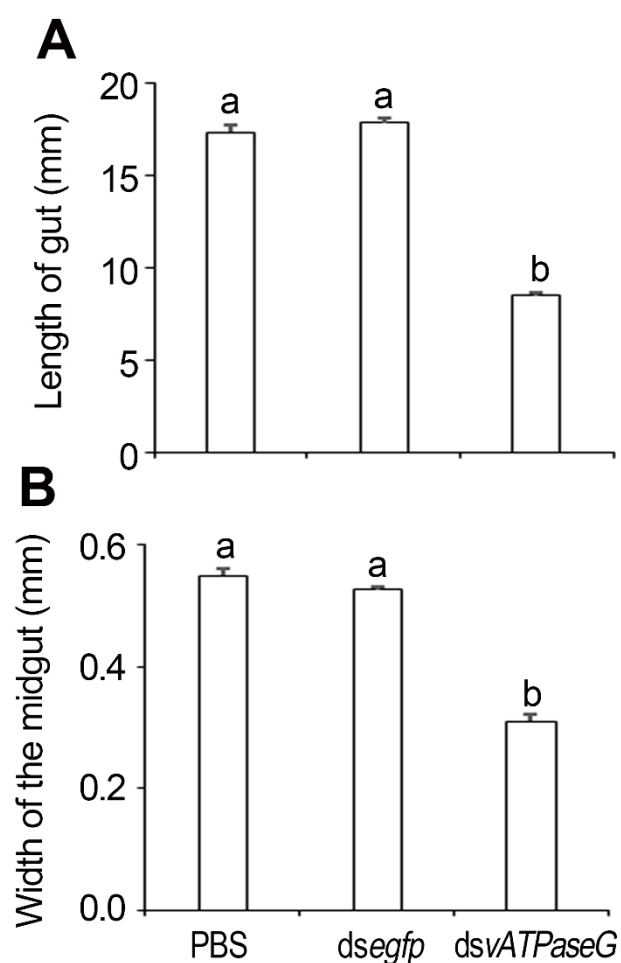

**Figure S3.** The impacts of dsRNA on the lengths (A) and widths (B) in *Henosepilachna vigintioctopunctata*. The newly-ec-dysed fourth instar larvae had ingested PBS-, dsegfp-, and dsvATPaseG-dipped leaves for three days. The guts were dissected 5 days after the initiation of bioassay. The lengths and widths were measured. The bars represent values ( $\pm$  SE). Different letters indicate significant difference at P value  $< 0.05$  using analysis of variance with the Tukey-Kramer test.

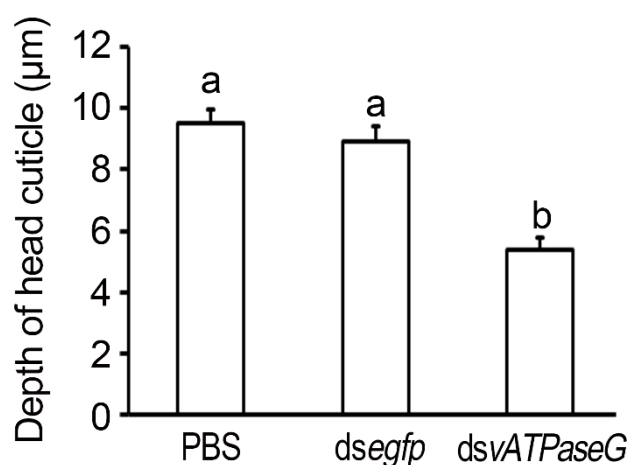

**Figure S4.** The impacts of dsRNA on the depth of head capsule in *Henosepilachna vigintioctopunctata*. Table 2. days. The sections of the head capsule were stained using hematoxylin-eosin (HE) method. The depths were measured. The bars represent values ( $\pm$  SE). Different letters indicate significant difference at P value  $< 0.05$  using analysis of variance with the Tukey-Kramer test.
